# Supplementary material for: Lack of antidepressant effects of burst-suppressing isoflurane anesthesia in adult male Wistar outbred rats subjected to chronic mild stress
Source: PLOS journal article supplement (doi:10.1371/journal.pone.0235046), 2020-06-24
Supplement: S1 (10.1371/journal.pone.0235046.s001) [file journal.pone.0235046.s001]

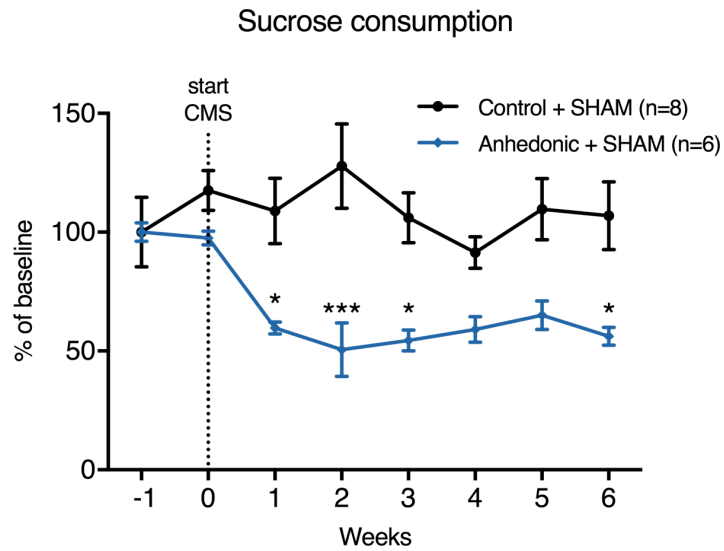

**Figure S1. Sucrose consumption of the anhedonic rats remain significantly lower than in control group throughout the experiments.** CMS = chronic mild stress. \*\*\*<0.001, \*<0.05, Repeated measures ANOVA followed by Sidak's multiple comparisons test.
